# Supplementary material for: Participatory Landscape Conservation: A Case Study of a Seasonally Dry Tropical Forest in Michoacan, Mexico
Source: Preprints.org preprint supplement (doi:10.20944/preprints202309.0578.v1), 2023-09-08
Supplement: Supplementary file 2 [file supplementary]

## Sheet: Cuadro 2
	ID	AGRARIAN COMMUNITY	MUNICIPALITY	DATE OF THE ASAMBLIES(S)	CORE ZONE FIRST PROPOSAL	CORE ZONE SECOND PROPOSAL	CONSENSUAL CORE ZONE	MEAN OF AGREEMENT
	1	AGUA NUEVA	CHURUMUCO	05 OF MAY	X			ASSEMBLY MINUTE
				26 OF MAY				ASSEMBLY MINUTE
	2	ARRONJADERO	LA HUACANA	15 MARCH	X			ASSEMBLY MINUTE
				04 OF MAY				ASSEMBLY MINUTE
				11 OF MAY				ASSEMBLY MINUTE
	3	CAJA DE ZICUIRAN	LA HUACANA	4 OF MARCH	X			ASSEMBLY MINUTE
		CAYACO	LA HUACANA	11 OF MARCH	X	X	X	ASSEMBLY MINUTE
				29 OF APRIL				ASSEMBLY MINUTE
	4	CERRO DE LA LUMBRE	ARTEAGA	14 OF APRIL	X			ASSEMBLY MINUTE
	5	CHURUMUCO Y ANX. LAS PILAS Y TIMBIRICHE	CHURUMUCO	6; 14, 16 OF MARCH		X		ASSEMBLY MINUTE
				5 OF APRIL				ASSEMBLY MINUTE
				28 OF APRIL				ASSEMBLY MINUTE
	6	COL. FRANCISCO VILLA	LA HUACANA	25 OF MARCH	X			ASSEMBLY MINUTE
				1 OF APRIL				ASSEMBLY MINUTE
	7	COLONIA LAZARO CARDENAS	LA HUACANA	11 OF MARCH	X	X	X	ASSEMBLY MINUTE
	8	CONGURIPO	LA HUACANA	19 OF MARCH	X	X	X	ASSEMBLY MINUTE
				25 OF MARCH				ASSEMBLY MINUTE
				1 OF APRIL				ASSEMBLY MINUTE
	9	CUIMBO Y ANX.	LA HUACANA	1ª. 2 MARCH	X	X	X	ASSEMBLY MINUTE
				2ª. 29 APRIL				ASSEMBLY MINUTE
	10	CUNUATO	CHURUMUCO	15 OF APRIL	X			ASSEMBLY MINUTE
				13 OF MAY				ASSEMBLY MINUTE
				2 OF JUNE				ASSEMBLY MINUTE
				6 OF JUNE				ASSEMBLY MINUTE
	11	DOTACION CUERAMATO	CHURUMUCO	31 OF MAY	X			ASSEMBLY MINUTE
	12	EL AHUIJOTE	CHURUMUCO	27 OF MAY	X			ASSEMBLY MINUTE
	13	EL ALGODÓN Y OROPEO Y ANX.	LA HUACANA	5 OF MARCH	X		X	ASSEMBLY MINUTE
	14	EL CASCALOTE	ARTEAGA	11 OF APRIL	X			ASSEMBLY MINUTE
				15 OF APRIL				ASSEMBLY MINUTE
	15	EL CHAUZ	LA HUACANA	11 OF MARCH	X			ASSEMBLY MINUTE
				25 OF MARCH				ASSEMBLY MINUTE
				4 OF MARCH				ASSEMBLY MINUTE
	16	EL CHILAR	LA HUACANA	27 OF APRIL	X			ASSEMBLY MINUTE
	17	EL PALMAR Y ANX. (MESA DE VICENTELO PUERTA)	LA HUACANA	9 OF MARCH	X			ASSEMBLY MINUTE
				28 OF APRIL				ASSEMBLY MINUTE
	18	EL SAUZ	ARTEAGA	14 OF APRIL			X	ASSEMBLY MINUTE
	19	EL TERRERO	LA HUACANA	14 APRIL	X	X	X	ASSEMBLY MINUTE
	20	GENERAL LAZARO CARDENAS (CIRIANCITOS)	LA HUACANA	4 OF MARCH	X			ASSEMBLY MINUTE
				1 OF APRIL				ASSEMBLY MINUTE
				7 OF APRIL				ASSEMBLY MINUTE
	21	GUADALPE OROPEO Y ANX. LAS CRUCECITAS	LA HUACANA	1 OF MARCH	X			ASSEMBLY MINUTE
				4 OF MARCH				ASSEMBLY MINUTE
	22	HUATZIRAN Y ANEXOS (LAS VACAS Y LOS PLACERES)	LA HUACANA	18 OF FEB.	X	X	X	ASSEMBLY MINUTE
				6 OF MARCH				ASSEMBLY MINUTE
				22 OF APRIL				ASSEMBLY MINUTE
	23	ICHAMIO Y ANX. EL TIZATAL	LA HUACANA	4 OF MARCH	X	X	X	ASSEMBLY MINUTE
	24	LA HIGUERITA Y ANX. (EL PASEO)	CHURUMUCO	26 OF MAY				ASSEMBLY MINUTE
	25	LA HUACANA	LA HUACANA	22 OF MARCH	X	X	X	ASSEMBLY MINUTE
				15 OF APRIL				ASSEMBLY MINUTE
				22 OF APRIL				ASSEMBLY MINUTE
	26	LA LOMA	CHURUMUCO	11 OF APRIL				ASSEMBLY MINUTE
	27	LA PAREJA	ARTEAGA	11 OF APRIL	X			ASSEMBLY MINUTE
	28	LA PITIRERA	ARTEAGA	14 OF APRIL			X	ASSEMBLY MINUTE
								ASSEMBLY MINUTE
	29	LA VINATA	ARTEAGA	1 OF APRIL	X	X	X	ASSEMBLY MINUTE
	30	LAS ANONAS Y ANX.	LA HUACANA	29 OF APRIL	X			ASSEMBLY MINUTE
	31	LAS CARAMICUAS	TUMBISCATIO	27 OF MAY	X			ASSEMBLY MINUTE
				3 OF JUNE				ASSEMBLY MINUTE
				9 OFJUNE				ASSEMBLY MINUTE
	32	LAS CRUCES	TUMBISCATIO	27 OF MAY		X		ASSEMBLY MINUTE
				3 OF JUNE				ASSEMBLY MINUTE
				9 OF JUNE				ASSEMBLY MINUTE
	33	LAS ESTANCIAS	LA HUACANA	10 OF MARCH	X			ASSEMBLY MINUTE
				20 OF MARCH				ASSEMBLY MINUTE
	34	LAS PILAS	CHURUMUCO	26 OF MAY		X		ASSEMBLY MINUTE
	35	LAS TAMACUAS	LA HUACANA	28 OF APRIL		X	X	ASSEMBLY MINUTE
				4 OF MAY				ASSEMBLY MINUTE
	36	LIMON DE JORULLO	LA HUACANA	13 OF APRIL	X		X	ASSEMBLY MINUTE
	37	LLANO DE OJO DEAGUA	CHURUMUCO	5 OF MAY				ASSEMBLY MINUTE
				19 OF MAY				ASSEMBLY MINUTE
	38	LOS CHIVOS Y ANX.	TUMBISCATIO	9 OF JUNE				ASSEMBLY MINUTE
	39	LOS COPALES Y ANX.	ARTEAGA	28 OF APRIL			X	ASSEMBLY MINUTE
	40	LOS CUERAMOS DE LA VINATA		1 OF APRIL	X		X	ASSEMBLY MINUTE
	41	LOS HORCONES	ARTEAGA	1 OF APRIL	X			ASSEMBLY MINUTE
	42	LOS OLIVOS	LA HUACANA	1 OF MARCH	X			ASSEMBLY MINUTE
	43	LOS POCITOS	LA HUACANA	6 OF MARCH	X	X	X	ASSEMBLY MINUTE
				27 OF MARCH				ASSEMBLY MINUTE
				1 OF APRIL				ASSEMBLY MINUTE
	44	MANGA DE CHAVEZ ANX. (EL PALMARCITO Y LA CRUCITA)	LA HUACANA	29 OF APRIL				ASSEMBLY MINUTE
								ASSEMBLY MINUTE
	45	MANGA DE CUIMBIO	LA HUACANA	11 OF MARCH	X	X	X	ASSEMBLY MINUTE
				13 OF APRIL				ASSEMBLY MINUTE
	46	MELCHOR OCAMPO	CHURUMUCO	6 OF MAY	X	X		ASSEMBLY MINUTE
				20 OF MAY				ASSEMBLY MINUTE
	47	N.C.P. CUERAMATO	CHURUMUCO	31 OF MAY				ASSEMBLY MINUTE
	48	N.C.P.ARTEAGA. LA ESTANCIA O BELLAS FUENTES Y ANX.	LA HUACANA	24 OF FEB	X	X	X	ASSEMBLY MINUTE
				11 OF MARCH.				ASSEMBLY MINUTE
				28 OF MARCH				ASSEMBLY MINUTE
				20 OF APRIL				ASSEMBLY MINUTE
	49	N.C.P.E. ESFUERZO DEL CAMPESINO	LA HUACANA	4 OF MARCH	X	X	X	ASSEMBLY MINUTE
				11 OF MARCH				ASSEMBLY MINUTE
				6 OF MAY				ASSEMBLY MINUTE
	50	PALMA, PALMA DE GUARO Y ANX. (LA CALERA, COPALITOS)	CHURUMUCO	6 OF MAY	X			ASSEMBLY MINUTE
				12 OF MAY				ASSEMBLY MINUTE
	51	PIEDRAS NEGRAS	LA HUACANA	4 OF MARCH				ASSEMBLY MINUTE
				06 OF MAY				ASSEMBLY MINUTE
	52	PINZANDARAN	ARTEAGA	1 OF APRIL		X	X	ASSEMBLY MINUTE
	53	PUEBLO VIEJO	LA HUACANA	14 OF APRIL	X	X	X	ASSEMBLY MINUTE
								ASSEMBLY MINUTE
	54	SAN FRANCISCO DE LOS RANCHOS	LA HUACANA	24 OF FEB	X		X	ASSEMBLY MINUTE
				24 OF MARCH				ASSEMBLY MINUTE
	55	SAN ISIDRO Y LOS ADOBES	LA HUACANA	18 OF FEB	X			ASSEMBLY MINUTE
	56	SAN JOSE DEL MILAGRO	ARTEAGA	12 OF APRIL	X		X	ASSEMBLY MINUTE
	57	SIN AGUA	LA HUACANA	1 OF FEBRERO	X			ASSEMBLY MINUTE
				28 OF FEBRERO				ASSEMBLY MINUTE
				19 OF MARCH				ASSEMBLY MINUTE
	58	TOLUQUILLA	ARTEAGA	14 OF APRIL		X	X	ASSEMBLY MINUTE
				28 OF APRIL				ASSEMBLY MINUTE
				1 OF JUNE				ASSEMBLY MINUTE
	59	VILLA HERMOSA	LA HUACANA	28 OF APRIL	X			ASSEMBLY MINUTE
	60	ZICUIRAN	LA HUACANA	4 OFMARCH	X	X	X	ASSEMBLY MINUTE
				10 OF MARCH				ASSEMBLY MINUTE
	61	EL CAPIRE DE OROPEO	LA HUACANA	29 OF APRIL	X			NONE
	62	GRACIANO SANCHEZ	TUMBISCATIO	8 OF JUNE				NONE
	63	LOS COPALES	ARTEAGA	28 OF APRIL		X		NONE
	64	LOS LIMONES Y LOS ANEXOS (EL CHUPADERO Y LOS BARRILLOS)	LA HUACANA	17 OF MARCH	X
				9 OF JUNE				NONE
